# Supplementary material for: Atmospheric gas plasma–induced ROS production activates TNF-ASK1 pathway for the induction of melanoma cancer cell apoptosis
Source: PubMed Central journal article supplement — Mol Biol Cell. 2014 May 1;25(9):1523–31. doi: 10.1091/mbc.E13-10-0590 (PMC4004600; doi:10.1091/mbc.e13-10-0590), 2014-05-01
Supplement: supp_E13-10-0590v1_CombinedSupMats.pdf [file supp_E13-10-0590v1_CombinedSupMats.pdf]

# Supplemental Materials

*Molecular Biology of the Cell*

Ishaq et al.

## **Supplementary data**

### **Supplementary Methods**

#### **Identification of reactive species**

The reactive species produced by the plasma jet were identified by collecting the emission spectra using a high-resolution emission spectroscopy (Princeton Instruments, Acton SP 2500, equipped with Pixis 256 CCD detector). The spectra (one of them is shown in Sup. Fig. 2) were collected during the cells treatment at the applied discharge voltage, Helium flow rate and RF frequency of 1.8kV, 2 L/min and 230 kHz, respectively. The wavelength calibration was performed with Hg and Ne/Ar light source prior to the collection of spectra. The spectroscope with the grating (1200 g/mm) and slit width (100  $\mu\text{m}$ ) were used in our experiments. Spectrum in Sup. Fig. 1 reveals that the excited species such as O, OH, He, N<sub>2</sub> and N<sub>2</sub><sup>+</sup> were generated in the plasma jet.

## Supplementary Figures

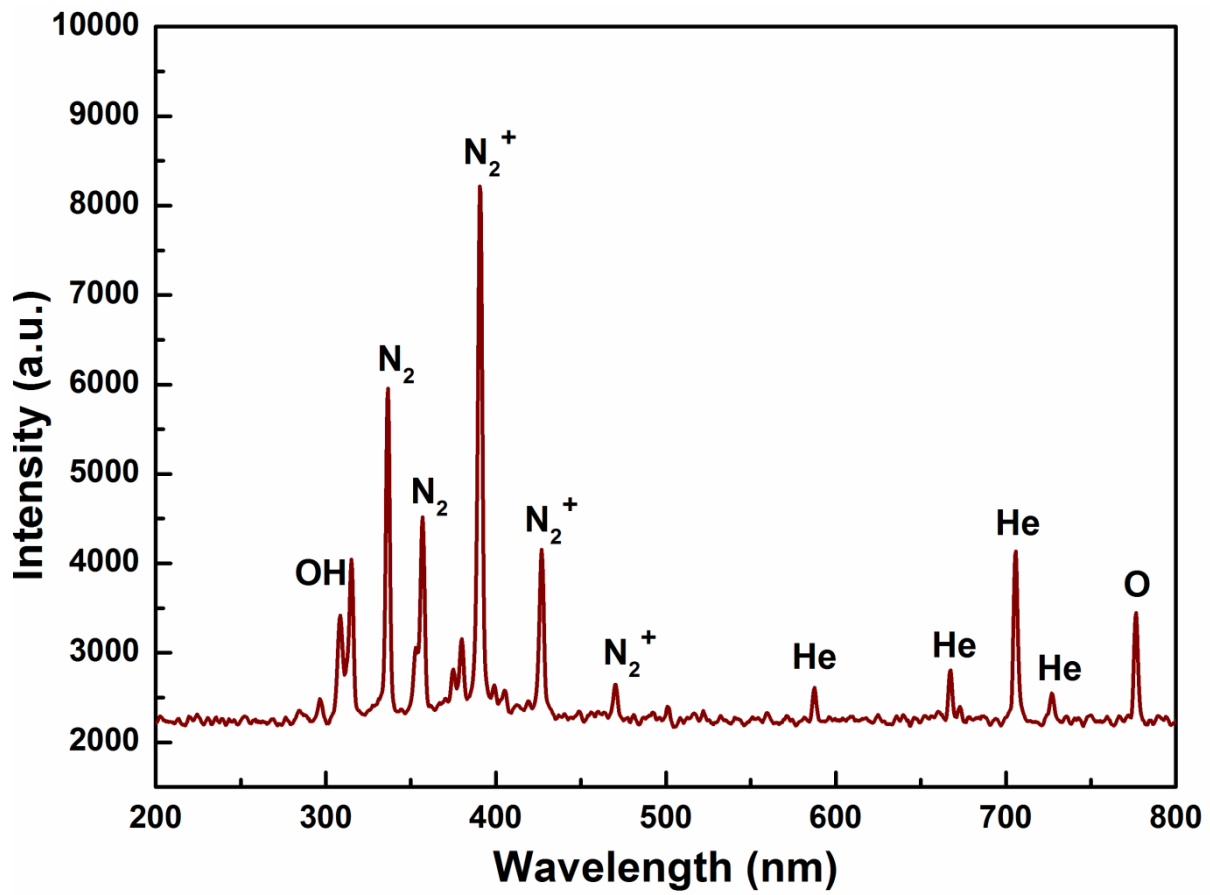

**Supplementary Fig. 1.** An optical emission spectrum of the plasma jet in the wavelength range of 200-800 nm.

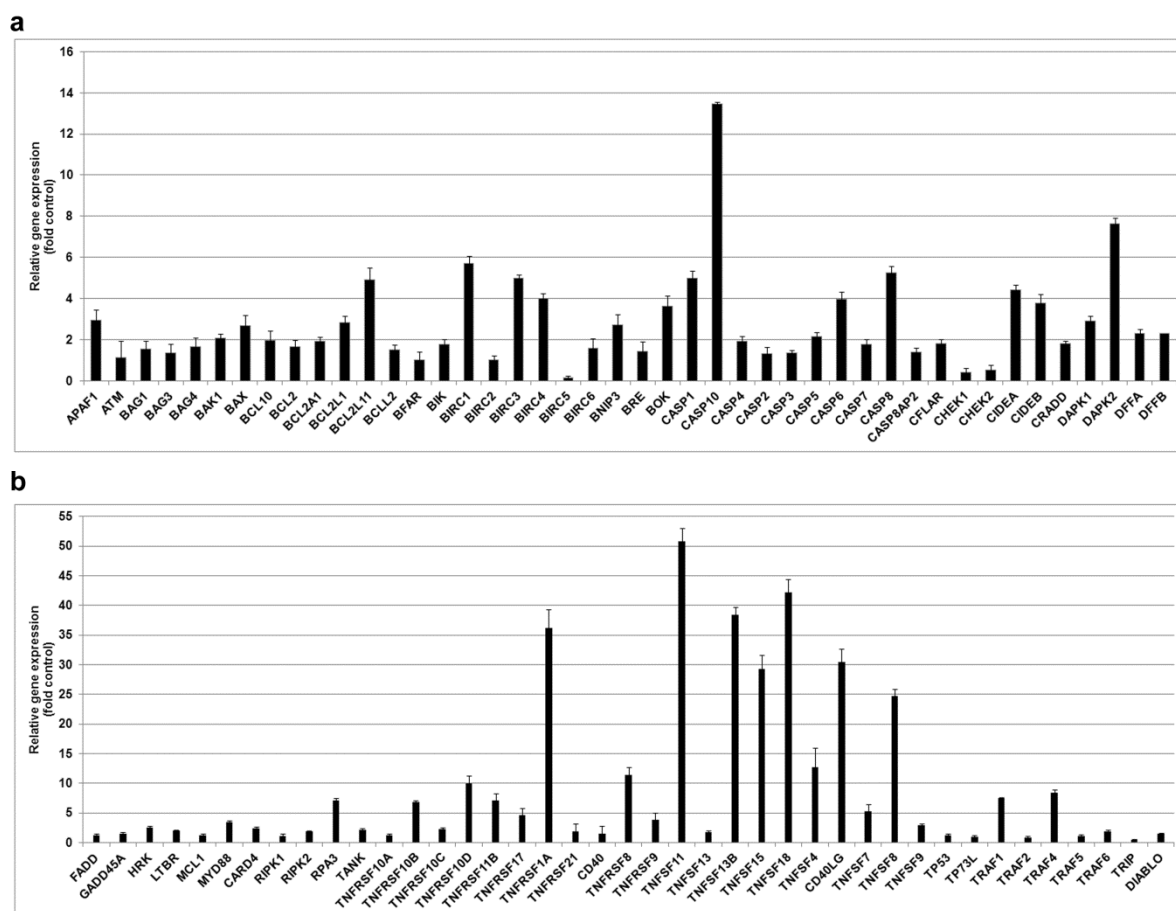

**Supplementary Fig. 2.** TNF signaling pathway family members up-regulated after AGP treatment. (a, b) Apoptosis-related intracellular differential gene expression pattern was quantified by using >90 different genes involved in apoptosis. The Mel007 cells were treated with AGP (30 sec) and relative gene expression was measured by quantitative real-time PCR after 24 hrs following the AGP treatment. Gene expression was normalized by internal genes (Actin-b, GAPDH and GUSB) and quantified as fold change compared to He gas-treated control cells. All values are mean  $\pm$  s.d. of three independent experiments.

**Table-1: Intracellular glutathione content of melanocytes and melanoma cells**

|                                       | Melanocytes |             |             |             | Mel007      |             |             |              |
|---------------------------------------|-------------|-------------|-------------|-------------|-------------|-------------|-------------|--------------|
|                                       | Control     | AGP         |             |             | Control     | AGP         |             |              |
|                                       |             | 5s          | 15s         | 30s         |             | 5s          | 15s         | 30s          |
| GSH (% of control)                    | 100         | 93.12 ± 1.1 | 96.1 ± .23  | 92.8 ± 1.8  | 100         | 67.2 ± .23* | 45 ± 1.8**  | 18.93 ± 2*   |
| % Viability                           | 91.2 ± .93  | 88.34 ± 2.2 | 90.1 ± 2.33 | 86.6 ± 3.1  | 94.2 ± 1.3  | 70.2 ± 1.2* | 42.1 ± 1.2* | 17.51 ± 2.4* |
| Total viable cells (10 <sup>5</sup> ) | 8.87 ± 2.0  | 8.67 ± 1.61 | 9.03 ± 1.53 | 8.03 ± 2.41 | 9.12 ± 2.02 | 6.8 ± 3.14* | 4.36 ± .69* | 2.17 ± 1.56* |

Melanocytes and melanoma (Mel007) cells were treated with AGP (5, 15 and 30 sec). Total glutathione content was determined as described in materials and methods. The viable cells were counted by staining with trypan blue. The results represent the means ± s.d. of three independent experiments performed in triplicate. \*p ≤ 0.01, \*\*p ≤ 0.001; ANOVA.
